# Supplementary material
Source: HighWire-hosted journal article supplement (https://bmjopensem.bmj.com/content/5/1/e000511)
Supplement: inline-supplementary-material-3 [file inline-supplementary-material-3.docx]

**Supplement 3**

Translation procedure of LEFS and PHIQ

The original questionnaires were individually translated to Swedish by three of the authors (Xa, Xb, and Xc). A synthesis of these translations was formed, and these versions were translated back by a native English-speaking bilingual research nurse (Xd). A committee consisting of the bilingual nurse (Xd) the authors (Xa and Xb) identified items or words that were not equivalent. The Swedish version was then sent to 6 physiotherapists and 6 nurses for comments. The final Swedish versions and the English questionnaires are presented as supplementary material (I, II, III).

**Swedish version of LEFS**

**Instruktioner**

Vi är intresserade av att veta om du på grund av **de aktuella besvären i ditt skadade ben**, har någon som helst svårighet att utföra aktiviteterna beskrivna nedan. Vänligen ringa in ett svar för var och en av nedanstående aktiviteter.

**Har du eller skulle du idag ha någon svårighet att:**

| **Aktiviteter** | **Extremt svårt eller omöjligt att genomföra** | | **Mycket svårt att genomföra** | **Måttliga svårigheter att genomföra** | | **Har lite svårt att genomföra** | **Inga problem att genomföra** |
| --- | --- | --- | --- | --- | --- | --- | --- |
| 1 ) Arbete, hushållsarbete eller skola | 0 | 1 | | 2 | 3 | | 4 |
| 2) Dina vanliga hobbys sport- eller fritidsaktiviteter | 0 | 1 | | 2 | 3 | | 4 |
| 3) Gå i eller ur ett badkar | 0 | 1 | | 2 | 3 | | 4 |
| 4) Gå mellan rum | 0 | 1 | | 2 | 3 | | 4 |
| 5) Ta på skor och strumpor | 0 | 1 | | 2 | 3 | | 4 |
| 6) Huksitta | 0 | 1 | | 2 | 3 | | 4 |
| 7) Lyfta ett föremål från golvet t.ex. en matkasse | 0 | 1 | | 2 | 3 | | 4 |
| 8) Utföra lätta sysslor i hemmet | 0 | 1 | | 2 | 3 | | 4 |
| 9) Utföra tunga sysslor i hemmet | 0 | 1 | | 2 | 3 | | 4 |
| 10) Kliva i eller ur en bil | 0 | 1 | | 2 | 3 | | 4 |
| 11) Gå två kvarter | 0 | 1 | | 2 | 3 | | 4 |
| 12) Gå 1,5 kilometer | 0 | 1 | | 2 | 3 | | 4 |
| 13) Gå upp eller ner för 10 trappsteg | 0 | 1 | | 2 | 3 | | 4 |
| 14) Stå i en timme | 0 | 1 | | 2 | 3 | | 4 |
| 15) Sitta i en timme | 0 | 1 | | 2 | 3 | | 4 |
| 16) Springa på jämnt underlag | 0 | 1 | | 2 | 3 | | 4 |
| 17) Springa på ojämnt underlag | 0 | 1 | | 2 | 3 | | 4 |
| 18) Gör tvära vändingar när du springer fort | 0 | 1 | | 2 | 3 | | 4 |
| 19) Hoppa | 0 | 1 | | 2 | 3 | | 4 |
| 20) Vända dig i sängen | 0 | 1 | | 2 | 3 | | 4 |
| **Summa** |  |  | |  |  | |  |

**Swedish version of PHIQ**

Frågeformulär vid hög bakre lårmuskelskada

Namn…………………………………………………………………………………………………………………………………………………...

Dagens datum………………………………………………………………………………………………………………………………………

Vilket ben har du skadat? Höger Vänster

Var god fyll i nedanstående frågor angående din bakre lårmuskelskada/ operation för din bakre lårmuskelskada. Fyll cirklarna med bläck. Skriv inga kommentarer bredvid frågorna tack.

1. Hur mycket smärta har du i genomsnitt haft från din skadade/opererade lårmuskel senaste veckan?

Ingen smärta alls Extremt svår smärta

O O O O O O O O O O O

1. Hur ofta tar du något läkemedel för ditt skadade ben?

- Jag tar dagligen smärtstillande läkemedel för mitt skadade ben.
- Jag behöver ibland (1-2 gånger/vecka) ta smärtstillande läkemedel för mitt skadade ben.
- Jag behöver ytterst sällan ta smärtstillande läkemedel för mitt skadade ben (Några gånger per månad.)
- Jag behöver aldrig ta smärtstillande läkemedel för mitt skadade ben.

|  | **Ingen smärta** | **Lätt smärta** | **Medelsvår smärta** | **Svår smärta** | **Deltar inte** |
| --- | --- | --- | --- | --- | --- |
| Sova | O | O | O | O |  |
| Sitta | O | O | O | O |  |
| Hushållsarbete (t.ex. städa, laga mat tvätta, att klä sig) | O | O | O | O |  |
| Gå uppför trappor | O | O | O | O |  |
| Gå på plant underlag | O | O | O | O |  |
| Gå i uppförsbacke | O | O | O | O |  |
| Sprintlöpning | O | O | O | O | O |
| Springa 2-5 km | O | O | O | O | O |
| Springa långt >5km | O | O | O | O | O |
| Fysiskt ansträngande arbete/sportaktivitet | O | O | O | O | O |

1. Hur smärtsamt är ditt skadade ben vid nedanstående aktiviteter?
2. Hur mycket begränsar din bakre lårmuskelskada dig vid nedanstående aktiviteter?

|  | **Ingen begränsning** | **Lätt begränsning** | **Medelsvår begränsning** | **Svår**  **begränsning** | **Deltar inte** |
| --- | --- | --- | --- | --- | --- |
| Sova | O | O | O | O |  |
| Sitta | O | O | O | O |  |
| Hushållsarbete (t.ex. städa, laga mat tvätta, att klä sig) | O | O | O | O |  |
| Gå uppför trappor | O | O | O | O |  |
| Gå på plant underlag | O | O | O | O |  |
| Gå i uppförsbacke | O | O | O | O |  |
| Sprintlöpning | O | O | O | O | O |
| Springa 2-5 km | O | O | O | O | O |
| Springa långt >5km | O | O | O | O | O |
| Fysiskt ansträngande arbete/sportaktivitet | O | O | O | O | O |

1. Känns ditt skadade ben stelt?

- Jag har ingen stelhet alls i mitt skadade ben.
- Mitt skadade ben känns stelt på morgonen när jag går upp.
- Mitt skadade ben är vanligen stelt endast på kvällen.
- Mitt skadade ben känns endast stelt efter hårt fysiskt arbete eller sportaktivitet.
- Mitt skadade ben känns stelt hela tiden.

1. Upplever du domningar och eller stickningar nedom knäet i det skadade benet?

- Ja, jag har besvärande domningar och stickningar även i vila.
- Ja, jag har besvärande domningar och stickningar men endast under aktivitet.
- Ja, jag har domningar och stickningar men det besvärar mig inte.
- Nej, jag har inga domningar och stickningar.

1. Uppskatta hur återställd du är från din skada/operation. (Ringa in)

<25% 25% 50% 75% 100%

1. Uppskatta styrkan i ditt skadade ben. (Ringa in)

<25% 25% 50% 75% 100%

1. Är du nöjd med resultatet av behandlingen för din bakre lårmuskelskada? (Ringa in)

Ja Nej

1. Markera de idrotter du för närvarande utövar. (Fyll inte i om du inte utövar idrott) Du får välja mer än ett svar.

| ***Idrott*** | ***Nivå av deltagande*** | | | |
| --- | --- | --- | --- | --- |
|  | **Motionär** | **Elitmotionär** | **Elit** | **Internationell elit** |
| Volleyboll | O | O | O | O |
| Simning | O | O | O | O |
| Basket | O | O | O | O |
| Fotboll | O | O | O | O |
| Racketsport | O | O | O | O |
| Gymnastik | O | O | O | O |
| Golf | O | O | O | O |
| Brottning | O | O | O | O |
| Längdskidor/  alpinskidåkning | O | O | O | O |
| Ishockey | O | O | O | O |
| Löpning | O | O | O | O |
| Ange annan: | O | O | O | O |
|  | O | O | O | O |
|  | O | O | O | O |

1. Hur många timmar per vecka utövar du någon idrottsaktivitet?

Ange sammanlagt antal timmar: ……………………………………………………………………………………………
